# Supplementary material for: A Triple Gene-Deleted Pseudorabies Virus-Vectored Subunit PCV2b and CSFV Vaccine Protect Pigs against a Virulent CSFV Challenge
Source: MDPI journal article supplement (doi:10.3390/v15112143), 2023-10-25
Supplement: s1 [file s1]

**Supplementary table S1:** Classical swine fever virus (CSFV)-specific serum neutralizing (SN) antibody titer developed in pigs after PRVtmv+ vaccination

| Group   | #       | CSFV-Neutralizing antibody titer<br>(days post immunization) |        |
|---------|---------|--------------------------------------------------------------|--------|
|         |         | Day 0                                                        | Day 28 |
| PRVtmv+ | 84      | <1                                                           | 32     |
|         | 87      | <1                                                           | 16     |
|         | 88      | <1                                                           | 32     |
|         | 91      | <1                                                           | 32     |
|         | 92      | <1                                                           | 16     |
|         | Average | <1                                                           | 25.6   |

**Supplementary table S2:** Clinical evaluation: Body temperature of pigs following the classical swine fever virus (CSFV) challenge.

| Days post challenge | Pigs Temperature in °C |       |       |       |       |         |       |       |       |       |
|---------------------|------------------------|-------|-------|-------|-------|---------|-------|-------|-------|-------|
|                     | CSFV control           |       |       |       |       | PRVtmv+ |       |       |       |       |
|                     | 83                     | 85    | 86    | 89    | 90    | 84      | 87    | 88    | 91    | 92    |
| 0                   | 38.72                  | 38.94 | 39.83 | 39.72 | 39.88 | 39.27   | 40.16 | 39.55 | 38.77 | 39.38 |
| 1                   | 39.11                  | 39.27 | 39.44 | 39.55 | 39.33 | 39      | 39.5  | 39.44 | 38.55 | 39    |
| 2                   | 39                     | 39.44 | 39.33 | 39.44 | 39.11 | 39.33   | 39.33 | 39.27 | 38.88 | 39.27 |
| 3                   | 39.33                  | 39.11 | 39.5  | 39.55 | 39.33 | 39.5    | 39.27 | 39.44 | 39.27 | 39.5  |
| 4                   | 39.5                   | 39.27 | 39.33 | 39.44 | 39.27 | 39.11   | 39.55 | 39.11 | 39.22 | 39.88 |
| 5                   | 39.5                   | 40.61 | 40.94 | 40.88 | 41.11 | 39.38   | 39.77 | 39.5  | 39.5  | 40.88 |
| 6                   | 40.27                  | 41    | 41.11 | 40.61 | 40.5  | 39.22   | 39.77 | 39.55 | 39.16 | 39.77 |
| 7                   | 39.5                   | -     | 40.94 | 40.88 | 41.11 | 39.5    | 39.27 | 39.11 | 39.55 | 39.72 |
| 8                   |                        |       |       |       |       | 40.22   | 39.83 | 39.66 | 39.38 | 39.5  |
| 9                   |                        |       |       |       |       | 38.61   | 38.77 | 38.66 | 38.55 | 38.55 |
| 10                  |                        |       |       |       |       | 38.94   | 39.38 | 39.27 | 38.72 | 38.94 |
| 11                  |                        |       |       |       |       | 39.22   | 39.11 | 38.5  | 38.94 | 38.44 |
| 12                  |                        |       |       |       |       | 38.77   | 38.88 | 38.44 | 39.11 | 38.72 |
| 13                  |                        |       |       |       |       | 39      | 39.38 | 38.77 | 39.27 | 38.88 |
| 14                  |                        |       |       |       |       | 38.77   | 38.94 | 38.44 | 38    | 38.72 |
| 15                  |                        |       |       |       |       | 38.22   | 39.16 | 38.61 | 39.33 | 38.77 |
| 16                  |                        |       |       |       |       | 38.61   | 39.05 | 38.61 | 38.61 | 38.72 |
| 17                  |                        |       |       |       |       | 38.55   | 39.11 | 38.72 | 38.22 | 38.77 |
| 18                  |                        |       |       |       |       | 38.72   | 39.38 | 39.11 | 39.11 | 39.27 |
| 19                  |                        |       |       |       |       | 39.11   | 39.44 | 38.77 | 38.77 | 39    |
| 21                  |                        |       |       |       |       | 38.88   | 39.11 | 38.88 | 39    | 38.77 |

**Supplementary table S3:** Classical swine fever virus (CSFV)-associated viremia in blood following CSFV-challenge in pigs. TCID<sub>50</sub> - 50% tissue culture infectious dose.

| Group        | #       | CSFV-viremia in blood - Log <sub>10</sub> TCID <sub>50</sub> /ml (days post-challenge) |       |       |            |        |
|--------------|---------|----------------------------------------------------------------------------------------|-------|-------|------------|--------|
|              |         | Day 0                                                                                  | Day 4 | Day 7 | Day 14     | Day 21 |
| CSFV control | 83      | <1.8                                                                                   | 3.05  | 5.8   | Euthanized |        |
|              | 85      | <1.8                                                                                   | 3.55  | 5.8   |            |        |
|              | 86      | <1.8                                                                                   | 3.8   | 6.05  |            |        |
|              | 89      | <1.8                                                                                   | 2.8   | 6.05  |            |        |
|              | 90      | <1.8                                                                                   | 3.8   | 6.55  |            |        |
|              | Average | <1.8                                                                                   | 3.4   | 6.05  |            |        |
| PRVtmv+      | 84      | <1.8                                                                                   | 3.33  | 2.55  | <1.8       | <1.8   |
|              | 87      | <1.8                                                                                   | 2.05  | 2.05  | <1.8       | <1.8   |
|              | 88      | <1.8                                                                                   | 2.55  | 2.55  | <1.8       | <1.8   |
|              | 91      | <1.8                                                                                   | 2.3   | 2.05  | <1.8       | <1.8   |
|              | 92      | <1.8                                                                                   | 2.05  | <1.8  | <1.8       | <1.8   |
|              | Average | <1.8                                                                                   | 2.45  | 1.84  | <1.8       | <1.8   |

**Supplementary table S4:** Leukocytes count in pigs following virulent classical swine fever virus challenge in pigs.

| Group        | #  | Leukocytes count (per $\mu\text{l}$ ) (days post challenge) |       |       |        |        |
|--------------|----|-------------------------------------------------------------|-------|-------|--------|--------|
|              |    | Day 0                                                       | Day 4 | Day 7 | Day 14 | Day 21 |
| CSFV control | 83 | 16040                                                       | 7540  | 5040  |        |        |
|              | 85 | 13240                                                       | 2760  | 6020  |        |        |
|              | 86 | 12260                                                       | 7300  | 16200 |        |        |
|              | 89 | 18860                                                       | 5200  | 20480 |        |        |
|              | 90 | 13100                                                       | 11840 | 10980 |        |        |
| PRVtmv+      | 84 | 19740                                                       | 15020 | 20660 | 17240  | 11260  |
|              | 87 | 25400                                                       | 17060 | 25760 | 3940   | 10580  |
|              | 88 | 32540                                                       | 12320 | 27480 | 41680  | 31460  |
|              | 91 | 17120                                                       | 19900 | 18320 | 14160  | 11840  |
|              | 92 | 16000                                                       | 7240  | 9560  | 17060  | 9380   |

Normal leukocytes range in pigs -  $11 - 22 \times 10^3/\mu\text{l}$

**Supplementary table S5:** Lymphocytes count in pigs following virulent classical swine fever virus challenge in pigs.

| Group        | #  | Lymphocytes count (per ml) (days post challenge) |       |       |        |        |
|--------------|----|--------------------------------------------------|-------|-------|--------|--------|
|              |    | Day 0                                            | Day 4 | Day 7 | Day 14 | Day 21 |
| CSFV control | 83 | 8550                                             | 3950  | 1920  |        |        |
|              | 85 | 9560                                             | 1140  | 1200  |        |        |
|              | 86 | 6680                                             | 1940  | 1710  |        |        |
|              | 89 | 10260                                            | 2000  | 2050  |        |        |
|              | 90 | 6620                                             | 4110  | 1370  |        |        |
| PRVtmv+      | 84 | 12660                                            | 6410  | 10890 | 8590   | 5730   |
|              | 87 | 12720                                            | 9990  | 11790 | 2560   | 5990   |
|              | 88 | 11780                                            | 4480  | 6260  | 10360  | 8730   |
|              | 91 | 11250                                            | 13360 | 9500  | 8630   | 7370   |
|              | 92 | 10160                                            | 3140  | 3630  | 10770  | 6300   |

Normal lymphocytes range in pigs -  $4.6 - 12 \times 10^3/\mu\text{l}$

**Supplementary table S6:** Platelets count in pigs following virulent classical swine fever virus challenge in pigs.

| Group        | #  | Platelets count (per $\mu\text{l}$ ) (days post challenge) |        |        |        |        |
|--------------|----|------------------------------------------------------------|--------|--------|--------|--------|
|              |    | Day 0                                                      | Day 4  | Day 7  | Day 14 | Day 21 |
| CSFV control | 83 | 358000                                                     | 224000 | 177000 |        |        |
|              | 85 | 439000                                                     | 29000  | 222000 |        |        |
|              | 86 | 644000                                                     | 164000 | 81000  |        |        |
|              | 89 | 479000                                                     | 194000 | 143000 |        |        |
|              | 90 | 375000                                                     | 197000 | 217000 |        |        |
| PRVtmv+      | 84 | 456000                                                     | 112000 | 375000 | 93000  | 159000 |
|              | 87 | 422000                                                     | 412000 | 281000 | 33000  | 231000 |
|              | 88 | 520000                                                     | 97000  | 187000 | 418000 | 287000 |
|              | 91 | 372000                                                     | 503000 | 415000 | 427000 | 349000 |
|              | 92 | 585000                                                     | 353000 | 434000 | 550000 | 377000 |

Normal platelets range in pigs -  $200$  to  $500 \times 10^3/\mu\text{l}$
